# Supplementary material for: Genetic Variants and Clinical Phenotypes in Korean Patients With Hereditary Hemorrhagic Telangiectasia
Source: PubMed Central journal article supplement — Clin Exp Otorhinolaryngol. 2021 Feb 26;14(4):399–406. doi: 10.21053/ceo.2020.02124 (PMC8606283; doi:10.21053/ceo.2020.02124), 2021-02-26
Supplement: ceo-2020-02124-suppl.pdf [file ceo-2020-02124-suppl.pdf]

Supplementary Table 1. In silico prediction of missense variants

| Family no. | Gene          | Nucleotide change <sup>a)</sup> | Protein change <sup>a)</sup> | PolyPhen-2 <sup>b)</sup>  | SIFT                  | PROVEAN <sup>c)</sup> |
|------------|---------------|---------------------------------|------------------------------|---------------------------|-----------------------|-----------------------|
| 21         | <i>ENG</i>    | c.821C>T                        | p.Thr274Ile                  | Probably damaging (0.999) | Predict tolerated     | Deleterious (-3.531)  |
| 6          | <i>ACVRL1</i> | c.199C>T                        | p.Arg67Trp                   | Probably damaging (0.998) | Predict not tolerated | Deleterious (-3.694)  |
| 10         | <i>ACVRL1</i> | c.925G>A                        | p.Gly309Ser                  | Probably damaging (0.999) | Predict not tolerated | Deleterious (-5.959)  |
| 12         | <i>ACVRL1</i> | c.781G>C                        | p.Ala261Pro                  | Probably damaging (1.000) | Predict not tolerated | Deleterious (-4.293)  |
| 30         | <i>ACVRL1</i> | c.605T>G                        | p.Val202Gly                  | Probably damaging (0.998) | Predict not tolerated | Deleterious (-6.296)  |
| 32         | <i>ACVRL1</i> | c.1124A>G                       | p.Tyr375Cys                  | Probably damaging (1.000) | Predict not tolerated | Deleterious (-8.984)  |
| 38         | <i>ACVRL1</i> | c.1005T>G                       | p.Asn335Lys                  | Probably damaging (1.000) | Predict not tolerated | Deleterious (-5.957)  |

<sup>a)</sup>Reference sequences to describe variants are NC\_000009.12 (*ENG* genomic DNA), NM\_000118.3 (*ENG* coding DNA), and NP\_000109.1 (*ENG* protein), NC\_000012.12 (*ACVRL1* genomic DNA), NM\_000020.3 (*ACVRL1* coding DNA), and NP\_000011.2 (*ACVRL1* protein). <sup>b)</sup>The score is indicated in parentheses.

<sup>c)</sup>The score is indicated in parentheses and the cutoff value is -2.5.
